# Supplementary material
Source: PubMed Central journal article supplement (PMC3506903)
Supplement: halms492299-supplement_3.pdf [file halms492299-supplement_3.pdf]

## Supplemental methods 1: Set of primers and LNAs used in this study

A

RT-qPCR oligonucleotides for the detection of encoding genes:

| genes        | Sense 5'-3'             | Antisense 5'-3'       |
|--------------|-------------------------|-----------------------|
| E-cadherin   | cccgggacaacggttattac    | gctggctcaagtcaaagtcc  |
| SNAI1        | gctgcaggactctaattccaga  | atctccggaggtgggatg    |
| StarD10      | ggacgctgcacaagatcaa     | aggacgtcgtagagtgtctcg |
| NQO2         | tcactgatgagcagaaaaaggtt | accagtacagcgggaaactga |
| Nectin-1     | accaaccccatcggtacac     | ggggtgtaggggaattctgt  |
| FLII         | tggtcctgaaagtctctgc     | ccagggtgttctgttcagg   |
| CACNA1H      | ctatgctgcgtgggagt       | ctcgcaggggtgtcttc     |
| RNPEPL1      | ccgcaacgactactatcctga   | ggtgtacatgctgacatctg  |
| Claudin-3    | aacctgcatggactgtgaaa    | ggtcaagtattggcgggtcac |
| Beta-catenin | ttaaaaagccagtttgggtaaaa | cccaccctaccaaccaagt   |
| KRT18        | tgatgacaccaatatcacacga  | gagcagctcctcttgagag   |
| GAPDH        | agccacatcgctcagacac     | gccaatacgaaccaatcc    |

RT-qPCR oligonucleotides for the detection of miRNAs:

| miRNAs   | Rt-specific oligonucleotides 5'-3'                  | pcr-sens               |
|----------|-----------------------------------------------------|------------------------|
| miR-661  | gtcgtatccagtgcagggtccgaggtattcgactggatacgcacgcgc    | gtgcttgggtctctggcct    |
| miR-200a | gtcgtatccagtgcagggtccgaggtattcgactggatacgcacatcg    | gcgcgtaaacactgtctggtaa |
| miR-200b | gtcgtatccagtgcagggtccgaggtattcgactggatacgcactcatca  | gcgcgtaatactgctggtaa   |
| miR-429  | gtcgtatccagtgcagggtccgaggtattcgactggatacgcacgggtt   | gcgcgtaatactgtctggtaa  |
| U6       | gtcgtatccagtgcagggtccgaggtattcgactggatacgcacaaaatgg | ggctgcgaaggatgacacgc   |

Sequences of the Locked Nucleic Acids (LNAs):

LNA-661 5'-A+C+G+CGCAGGCCAGAGACCCA+G+G+C+A-3'  
 LNA-sc 5'-AC+GCG+CAG+GCC+AGA+GAC+CCA+GGC+A-3'

D

Sequences of the siRNAs:

| siRNAs     | sequences 5'-3'           |
|------------|---------------------------|
| Nectin-1-a | CAA-ACC-CAC-CAA-UUG-GAU-A |
| Nectin-1-b | UAU-CCA-AUU-GGU-GGG-UUU-G |
| StarD10-a  | GCA-ACG-UCA-UUG-AGA-CUU-U |
| StarD10-b  | AAA-GUC-UCA-AUG-ACG-UUG-C |
