# Supplementary material
Source: PubMed Central journal article supplement (PMC3506903)

**A**

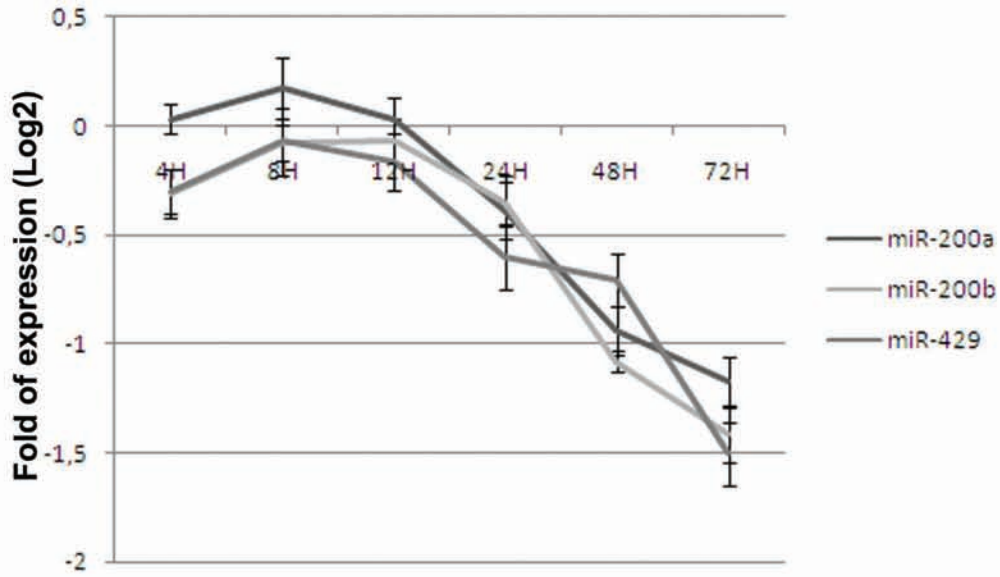

**B**

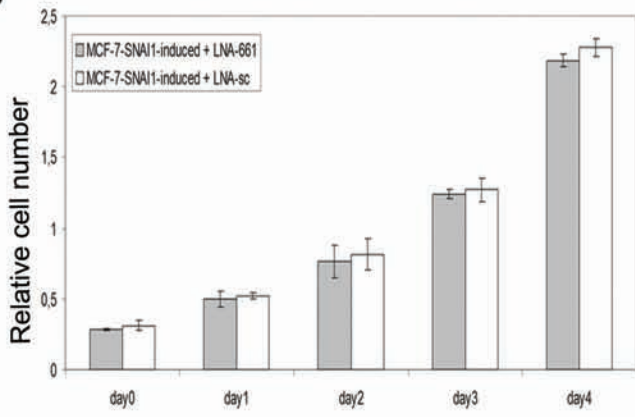

**C**

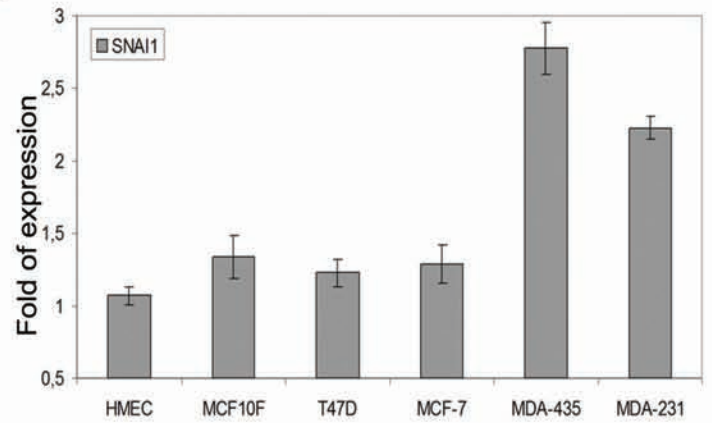

**D**

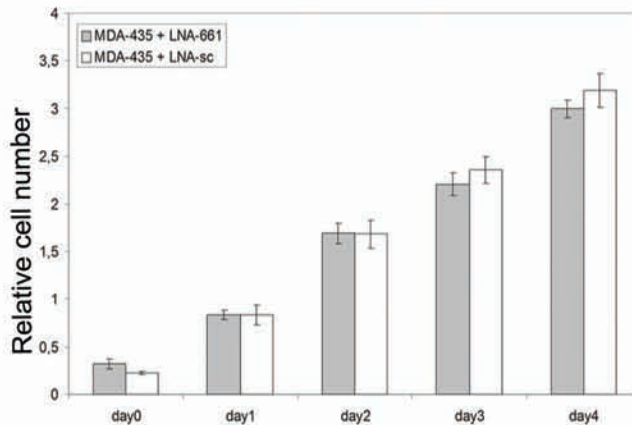

**E**

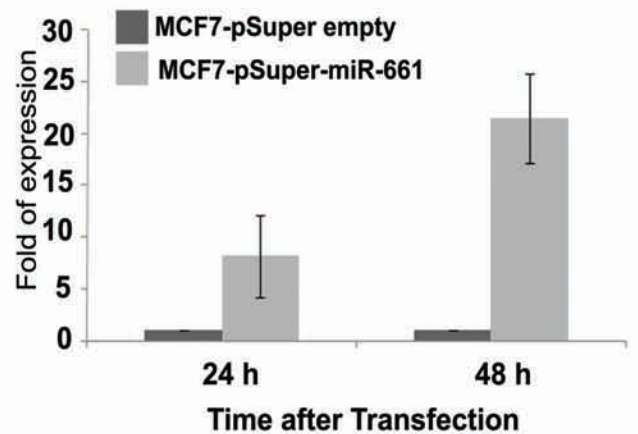

Supplement: halms492299-supplement_1.pdf [file halms492299-supplement_1.pdf]

**A**

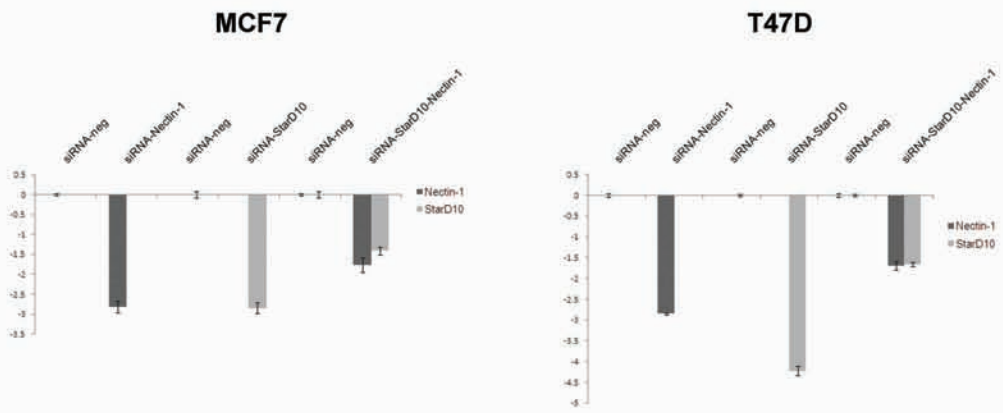

**B**

ectopic expression of GFP-nectin-1 and GFP-StarD10

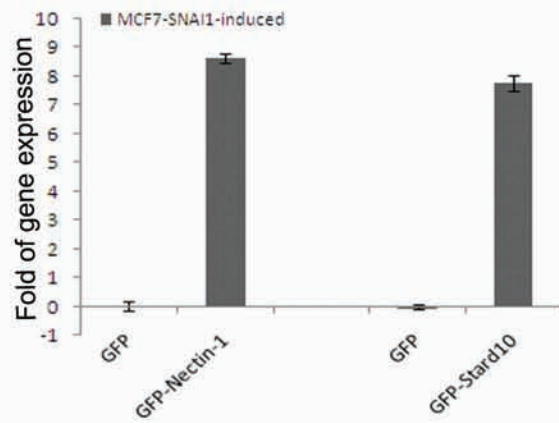

**C**

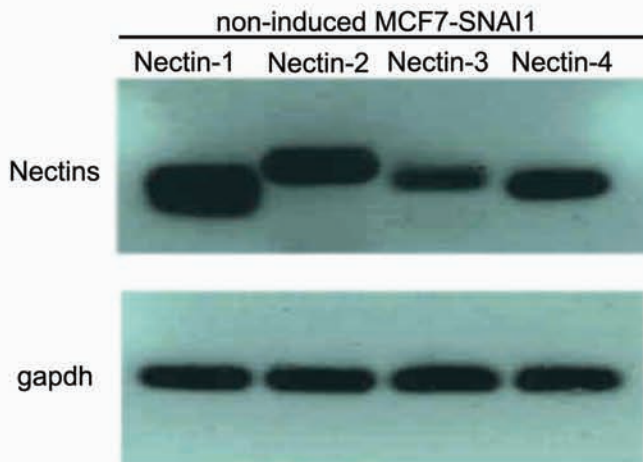

Supplement: halms492299-supplement_2.pdf [file halms492299-supplement_2.pdf]
